# Supplementary material
Source: PubMed Central journal article supplement (PMC3432826)
Supplement: jcbn11-33-FS1.pdf [file jcbn11-33-FS1.pdf]

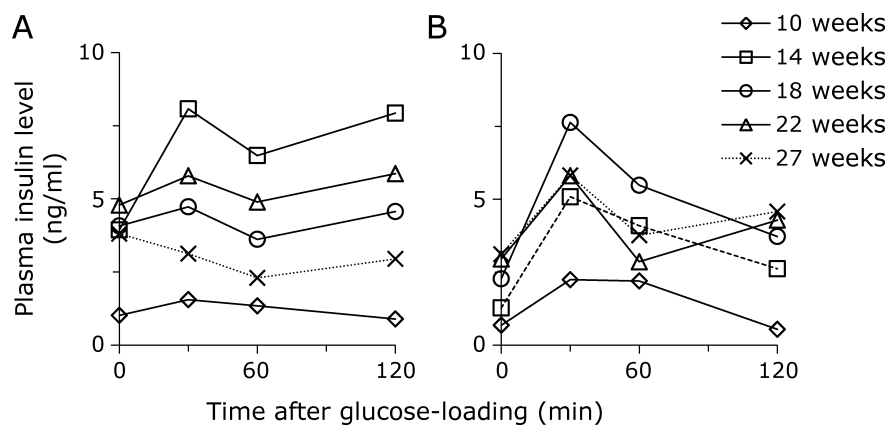

**Supplemental Fig. 1.** Alteration of plasma insulin levels in glucose-loaded OLETF (A,  $n = 7-8$ ) and LETO (B,  $n = 4$ ) rats during OGTT. An OGTT was performed for each rat one week before the sacrifice (at 10, 14, 18, 22, and 27 weeks of age). Rats were fasted overnight and then a 20% glucose solution was orally administered to the rats (2 g/kg body weight). Blood samples were collected from the tail vein by capillary with heparin. Insulin concentration in plasma obtained at 0, 30, 60 and 120 min after glucose loading were determined by an ELISA rat insulin kit.
