# Supplementary material
Source: PubMed Central journal article supplement (PMC3432826)
Supplement: jcbn11-33-FS2.pdf [file jcbn11-33-FS2.pdf]

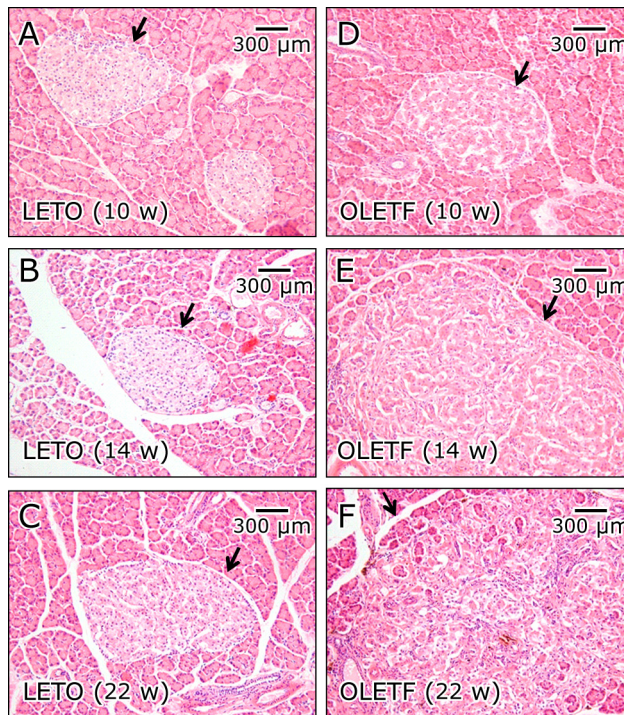

**Supplemental Fig. 2.** Histological analysis of the islets in LETO (A–C) and OLETF (D–F) rats at 10 (A, D), 14 (B, E), 22 (C, F) weeks of age. Rat pancreas were fixed with formalin, dehydrated with ethanol, and embedded in paraffin. Standard hematoxylin and eosin staining were performed using the paraffin sections to examine the size of islets indicated by arrows.
