# Supplementary material
Source: PubMed Central journal article supplement (PMC3432826)
Supplement: jcbn11-33-FS3.pdf [file jcbn11-33-FS3.pdf]

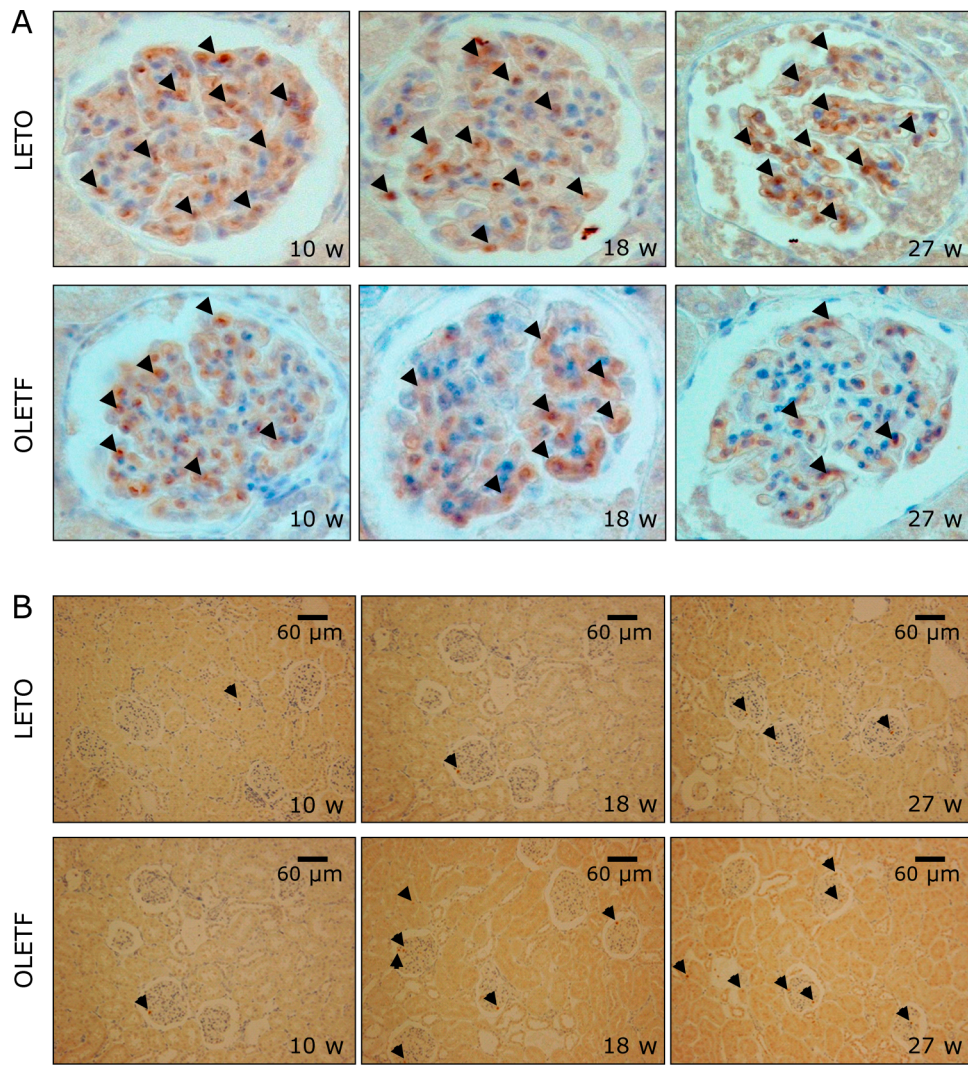

**Supplemental Fig. 3.** Immunohistochemical analysis of eNOS (A) and iNOS (B). Rat kidneys were prepared for immunohistochemical analysis to determine the localization of eNOS (frozen section) and iNOS (formalin-fixed paraffin section). After blocking the endogenous peroxidase activity by incubating with 0.3% H<sub>2</sub>O<sub>2</sub> in methanol for 15 min, the rat renal tissues were incubated overnight at 4°C with anti-eNOS or anti-iNOS antibody, washed, and reacted with secondary antibody conjugated with peroxidase-labeled polymer amino acid for 60 min. The peroxidase activity was visualized using 3,3'-diaminobenzidine. Counter staining was performed with Meyer's hematoxylin. Arrows are indicating positive staining.
